# Supplementary material for: Zincophilic multilayer graphene structures leveraging fast and ultrastable Zn-ion storage
Source: Royal Society of Chemistry journal article supplement (doi:10.1039/d3ta01107k), 2023-01-01
Supplement: d3ta01107k1.pdf [file d3ta01107k1.pdf]

## Electronic Supplementary Information

### Zincophilic multilayer graphene structures leveraging fast and ultra-stable Zn-ion storage

Qi Huang <sup>a</sup>, Yaowei Jin <sup>a</sup>, Lu Huang <sup>b</sup>, Yao Cong <sup>a</sup>, Zijie Xu <sup>\*a</sup>

<sup>a</sup>School of Chemical Science and Engineering, Tongji University, Shanghai, 200092, P. R. China.

<sup>b</sup>Department of Stomatology, Hangzhou Ninth People's Hospital, Hangzhou, 311225, P. R. China.

\*E-mail: [xzj@tongji.edu.cn](mailto:xzj@tongji.edu.cn) (Z. Xu)

## Section S1. Experimental Procedures

### 1.1 Materials.

Filter papers. NaCl (AR), HNO<sub>3</sub> (AR), sodium metal (CP), aqueous Zn(CF<sub>3</sub>SO<sub>3</sub>)<sub>2</sub> (AR) and Fe(NO<sub>3</sub>)<sub>3</sub>·9H<sub>2</sub>O (AR) were all purchased from Sinopharm Chemical Reagent Co., LtdS.

### 1.2 Preparation of Amorphous Carbons.

Fe(NO<sub>3</sub>)<sub>3</sub>·9H<sub>2</sub>O (4.03 g) was added in deionized water (20 mL) at 80 °C, and 5 g filter paper was soaking into it overnight to absorb iron salt. Then, previously soaked mixture was slowly poured into the 55 mL deionized water at 80 °C and stirred until forming paper pulp. After cooling, the paper pulp was sonicated for 30 minutes to fully disperse and was freeze-dried in a lyophilizer. After that, the obtained sample was ground into powder and heated at 700 °C for 2 h with a rate of 3 °C min<sup>-1</sup> to get carbonized sample. The resultant carbon materials were marked with Fe-*x*, where *x* referred to molar mass. As for the reference sample, the starch was treated following the same process but without Fe(NO<sub>3</sub>)<sub>3</sub>·9H<sub>2</sub>O. The resulted sample was named as Fe-0. Thus, the sample with 2.01 g, 4.03 g and 20.15 g Fe(NO<sub>3</sub>)<sub>3</sub>·9H<sub>2</sub>O were named as Fe-0.005, Fe-0.01 and Fe-0.05, respectively.

### 1.3 Preparation of Multilayer Graphene Structure in Amorphous Carbons.

0.20 g Fe-0.01 and 1.60 g NaCl were ground together, and 0.20 g sodium metal was carefully cut into particles, and the particles were evenly spread on the mixed sample, and then they were heated at 700 °C under N<sub>2</sub> atmosphere with a heating rate of 3 °C min<sup>-1</sup>. After obtaining the morphological characteristics, X-ray diffraction angle and Raman spectra, the carbonized sample was washed in 2M HNO<sub>3</sub> and dried at 80 °C before the final electrochemical test. The resultant sample were marked with Fe-*x*-Na-*y*, where *x* referred to molar mass of iron salt, *y* referred to mass ratio of amorphous carbon obtained last step and sodium metal. Thus, the sample was marked as

Fe-0.01-Na-1:1(Fe-Na-1:1). According to the above step, the sample with 0.4 g sodium metal was marked as Fe-0.01-Na-1:2(Fe-Na-1:2), and the sample with 0.6 g sodium metal was marked as Fe-0.01-Na-1:3(Fe-Na-1:3).

#### 1.4 Characterizations.

The microstructure was observed by JEM-2100 transmission electron microscope (TEM). Chemical composition and crystalline structure of carbon materials were measured by X-ray powder diffraction technique (XRD, Bruker D8 advance diffractometer). Raman spectra (Renishaw Invia) was investigated at an excitation wavelength of 514 nm to measure the graphitization degree of carbon materials. After above investigations, all samples have been washed in acid to remove the impurities. N<sub>2</sub> adsorption/desorption isotherms were achieved by an analyzer (Micromeritics) of ASAP 2460. The Brunauer-Emmett-Teller (BET) method was used to calculate the specific surface area and pore size.

#### 1.5 Electrochemical Measurements.

Before electrochemical measurement, all the sample has been washed *via* 2 M HNO<sub>3</sub> and dried at 80 °C. The working electrode mixed by resulted sample, graphite and PTFE in the ratio of 8:1:1 was made into thin wafer with a diameter of 5 mm. Above mixture was soaked in ethanol and dispersed in ultrasound for 2 h, then dried at 100 °C in the vacuum drying oven for 12 h and weighed. Carbon//Zn(CF<sub>3</sub>SO<sub>3</sub>)<sub>2</sub>//Zn hybrid supercapacitor was assembled in 2032 coin-type cell with the as-prepared carbon electrode as cathode, Zn foil anode and 3 M Zn(CF<sub>3</sub>SO<sub>3</sub>)<sub>2</sub> as electrolyte, while a glassy fibrous was used as separator in Zn ion hybrid capacitors.

Galvanostatic charging/discharge (GCD) was measured on the LAND-CT3001A battery test system with a potential range from 0 to 1.8 V. Cyclic voltammetry (CV) and electrochemical impedance spectroscopy (EIS) were investigated on the electrochemical workstation (CHI660E).

EIS was performed in the frequency range from 0.01 to 1,000 kHz. For the DRT calculation, the open Matlab code shared online by Prof. Francesco Giucci.<sup>[1, 2]</sup> The DRT analysis is a method to the deep investigation of EIS measurement. The distribution function of relaxation times depicts the time relaxation characteristics of the electrochemical workstation obtained. The DRT partitions the electrochemical process within different time constant ( $\tau$ ), showing the immediate method to the distribution of timescale. On account of the Tikhonov regulation and the regulation indexes is 0.001 in calculations.<sup>[3, 4]</sup> The range of DRT matching is based on the frequency range from 100 kHz to 0.01 Hz after the Kramers-Kronig validity test. The specific capacity ( $C_m$ , mA h g<sup>-1</sup>) and cycling performance were also evaluated on a LAND-CT3001A multichannel galvanostat within the voltage range of 0–1.8 V.

The gravimetric capacitance ( $C_{\text{three}}$ ,  $C_{\text{two}}$  F g<sup>-1</sup>) of the working electrode is computed according to the following equation:

$$C_{\text{three}} = \frac{I \times \Delta t}{m \times \Delta V} \quad (\text{Eq. S1})$$

$$C_{\text{two}} = \frac{4 \times I \times \Delta t}{m \times \Delta V} \quad (\text{Eq. S2})$$

where  $I$  (A g<sup>-1</sup>),  $\Delta t$  (s),  $m$  (g),  $\Delta V$  (V) is the current density, the discharge time, the total mass of sample electrodes and the voltage window, respectively.

The energy density ( $E$ ) and power density ( $P$ ) are calculated by the following equations:

$$E = C_m \times \Delta V \quad (\text{Eq. S3})$$

$$P = \frac{C_m \times \Delta V}{1000 \times \Delta t} \quad (\text{Eq. S4})$$

where  $\Delta V$  is the voltage window.

## Section S2. Supplementary Methods

### 2.1 Zn-Anode Utilization.

The utilization (%) of Zn anode is calculated based on the mass of consumed Zn foil ( $m_{\text{Zn}}$ , g  $\text{cm}^{-2}$ ) after charge/discharge process and the initial mass of Zn anode ( $m_{\text{initial Zn}}$ , 0.074 g  $\text{cm}^{-2}$ ), calculating by the following form:

$$\text{Utilization (\%)} = m_{\text{Zn}}/m_{\text{initial}} \times 100 \quad (\text{Eq. S5})$$

The  $m_{\text{Zn}}$  is collected with the discharge capacity ( $C$ , mAh  $\text{cm}^{-2}$ ) and the theoretical capacity of Zn anode ( $C_{\text{Zn}}$ , 820 mAh  $\text{g}^{-1}$ ) based on the following equation:

$$C = m_{\text{Zn}} \times C_{\text{Zn}} = m_{\text{carbon}} \times C_{\text{carbon}} \quad (\text{Eq. S6})$$

where  $C$  denotes on the mass loading of carbon materials on the cathode ( $m_{\text{carbon}}$ , g  $\text{cm}^{-2}$ ) and corresponding specific capacity ( $C_{\text{carbon}}$ , mAh  $\text{g}^{-1}$ ).

### 2.2 Electrochemically Active Surface Area.

The electrochemical active surface area (ECSA) is calculated through the following equation:

$$i_c = C_{\text{dl}} \times \nu \quad (\text{Eq. S7})$$

$$\text{ECSA} = \frac{C_{\text{dl}}}{C^*} \quad (\text{Eq. S8})$$

where  $i_c$  and  $\nu$  is the capacitive cathodic/anodic current (mA) and scan rate ( $\text{V s}^{-1}$ ), respectively. And  $C_{\text{dl}}$  is equal to the slope of  $i_c - \nu$  curve,  $C^*$  is a specific capacitance constant (40  $\mu\text{F cm}^{-2}$  in 1 M KOH). Assuming capacitance between 0.8–0.9 V can represent electrical double-layer capacitance,  $i_c$  and  $\nu$  are acquired from CV measured at different scan rates between 0.8–0.9 V vs. Ag/AgCl. Note: The specific capacitance constant of KOH solution is typically selected to

calculate the electrochemical active surface area, such as *J. Am. Chem. Soc.*, 2013, 135, 16977–16987.

### 2.3 Optical Energy Gap.

The optical energy gaps ( $E_g$ , eV) of carbon cathodes can be obtained by the ultraviolet-visible (UV-Vis) spectroscopy, which is expressed as:

$$\alpha \propto (h\nu - E_g)^{0.5}/h\nu \quad (\text{Eq. S9})$$

$$h\nu = 1280/\lambda \quad (\text{Eq. S10})$$

where  $\alpha$  represents the optical absorption coefficient  $h\nu$  is the photon energy,  $\lambda$  is the wavelength.

### 2.4 Activation Energy.

The activation energy ( $E_a$ , kJ mol<sup>-1</sup>) for the charge transfer process can be deduced using the following Arrhenius equation:

$$R_{ct}^{-1} = A \exp(-E_a/RT) \quad (\text{Eq. S11})$$

where  $R_{ct}$  is the charge transfer resistance ( $\Omega$ ),  $A$  is constant under a stable experimental condition,  $R$  represents the gas constant (8.314 J mol<sup>-1</sup> K<sup>-1</sup>), and  $T$  is Kelvin temperature (K). The  $\ln(R_{ct}^{-1})$  values are plotted vs.  $1000/T$ , and linear fitting is calculated to get  $E_a$ :

$$\ln(R_{ct}^{-1}) = -E_a/RT + k \quad (\text{Eq. S12})$$

where  $k$  is constant.

### 2.5 Ion Diffusion Behavior.

The relaxation time constant ( $\tau_0$ , s) is collected from the reciprocal of the frequency ( $f$ , Hz):

$$\tau_0 = 1/f \quad (\text{Eq. S13})$$

The ion transport resistivity ( $\sigma$ ,  $\Omega \text{ s}^{-0.5}$ ) and diffusion coefficient ( $D$ , cm<sup>2</sup> s<sup>-1</sup>) were investigated by EIS spectra according to the following equations:

$$Z' = \sigma\omega^{-0.5} + R_s + R_{ct} \quad (\text{Eq. S14})$$

And the ion diffusion coefficient ( $D$ ,  $\text{cm}^2 \text{s}^{-1}$ ) is calculated by equation as follows:

$$D = \frac{R^2 T^2}{2A^2 C^2 F^4 n^4 \sigma^2} \quad (\text{Eq. S15})$$

where  $R$  ( $8.314 \text{ J mol}^{-1} \text{ K}^{-1}$ ) is gas constant,  $T$  ( $293.15 \text{ K}$ ) is Kelvin temperature,  $A$  ( $\text{m}^2 \text{ g}^{-1}$ ) is the surface area of electrodes,  $C$  ( $\text{mol L}^{-1}$ ) is molar concentration of electrolyte,  $n$  is Faraday constant and  $\sigma$  ( $\Omega \text{ s}^{-0.5}$ ) is diffusive resistance.

## 2.6 Charge Storage Kinetics.

The relationship of total electrode capacitance ( $C_T$ ), electrical double-layer capacitance ( $C_E$ ), pseudocapacitance ( $C_P$ ) and the fast dynamic calculation can be described by the following equation:

$$C_T = C_E + kt^{0.5} \quad (\text{Eq. S16})$$

$$I = kv^b \quad (\text{Eq. S17})$$

$$I = k_1 v + k_2 v^{0.5} \quad (\text{Eq. S18})$$

$$Iv^{-0.5} = k_1 v^{0.5} + k_2 \quad (\text{Eq. S19})$$

where  $v$  ( $\text{mV s}^{-1}$ ),  $b$ ,  $k_1 v$ ,  $k_2 v^{1/2}$  is the scan rate, the power-law exponent, the current density contributed by fast-kinetic processes and the current density contributed by slow-kinetic processes, respectively.

## 2.7 Density Functional Theory.

Reduce Density Gradient (RDG): The theoretical calculations were conducted *via* the Gaussian 16W and Gauss View 6.0. The graphene/Zn-ion complex structure was optimized at the *wb97XD/6-31+G(d)* level of theory. The graphene edge was coordinated with H atoms. The RDG analysis was performed with Multiwfn program, where RDG values of  $\text{sign}(\lambda_2)\rho$  is symbol of attractive interactions, value near zero implies weak interactions.<sup>[5]</sup> Additionally, the corresponding

gradient isosurface was colored, which is able to show the interaction region and intensity. The noncovalent interaction (NCI) maps were plotted through VMD software.

Adsorption Energy ( $\Delta E_a$ ): The first-principles simulations of all structural models on account of density functional theory (DFT) method were carried out by the Vienna Ab-initio Simulation Package (VASP). The electron exchange-correlation interactions were simulated by the projector augmented wave (PAW) pseudopotentials with a plane-wave cutoff of 520 eV and Perdew-Burke-Ernzerhof (PBE) functional within the generalized gradient approximation. The convergence tolerances of energy and force is set to  $1 \times 10^{-5}$  eV and  $0.02$  eV  $\text{\AA}^{-1}$ . The geometry optimization was proceeded by the  $3 \times 3 \times 1$  Monkhorst-Pack k-point mesh. The adsorption energy was obtained through the following formula:

$$E_{\text{ads}} = E_{\text{Zn/carbon}} - E_{\text{carbon}} - E_{\text{Zn}} \quad (\text{Eq. S20})$$

where  $E_{\text{Zn/carbon}}$ ,  $E_{\text{carbon}}$ , and  $E_{\text{Zn}}$  is the energies of carbon systems with and without Zn adsorption, and the energy of single Zn atom in bulk structure, respectively. A more negative adsorption energy value reveals the stronger adsorption capability of the Zn ion on the carbon framework.

Charge Density Difference ( $\Delta\rho$ ): To analyze the bonding nature of Zn adsorbed on the dual doped carbon framework and charge transfer index between them detailly, the charge density differences of Zn adsorbed on the fabricated carbon structures were obtained by calculating the charge densities of the Zn atom and carbon matrix from the corresponding compounds.

$$\Delta\rho = \rho_{\text{H/carbon}} - \rho_{\text{H}} - \rho_{\text{carbon}} \quad (\text{Eq. S21})$$

## 2.8 Finite Element Simulations.

To unravel the fundamental mechanism of  $\text{Zn}^{2+}$  ion transport process in Fe-Na based ZHCs, CFD simulations were carried out through COMSOL Multiphysics software with the “Tertiary Current Distribution” and “Phase Field” module.<sup>[6]</sup> A battery-column model was fabricated,



representing the theoretical structure of Fe-Na based ZHCs. The size of the entire two-dimension model for ion transport process in battery-column was set as  $1.0 \times 4.0$  cm. The ion diffusion process within Fe-Na electrodes can be modeled and computed by the following Poisson-Nernst-Planck equations:

$$\nabla \cdot (D \nabla c_i + \frac{D z_i e}{k_B T} c_i \nabla V) = 0 \quad (\text{Eq. S22})$$

where  $c$ ,  $D$ ,  $z$ ,  $e$ ,  $k_B$  and  $T$  denote the ion concentration, the diffusion coefficient, the ion valence, the elementary charge, the Boltzmann constant, and the absolute temperature, respectively. The mentioned equations were solved in a time-dependent state to realize a steady state. In this work, to guarantee the high accuracy of the simulation outcome, the densest conventional triangular meshes were utilized for all simulations in the column. The MUMPS solver was used with a corresponding tolerance of 0.001.

The ion transport by the concentration diffusion in porous electrode model was set as  $3.0 \times 6.0$  mm in an area filled with electrolyte following the Fick's law:

$$\mathbf{N}_i = \mathbf{J}_i = -D_i \nabla c_i \quad (\text{Eq. S23})$$

$$\frac{\partial c_i}{\partial t} + \nabla \cdot \mathbf{J}_i = R_{i, tot} \quad (\text{Eq. S24})$$

where  $\mathbf{J}_i$  is the ion flux,  $D_i$  is the diffusion coefficient of electrolytes,  $c_i$  is the ion concentration of electrolytes,  $\nabla c_i$  is concentration gradient.

The relationship between the diffusion coefficient and electric mobility obeying the Nernst-Einstein equation:

$$\mathbf{N}_i = -D_i \nabla c_i - z_i u_{m,i} F c_i \nabla \phi_l + \mathbf{u} c_i = \mathbf{J}_i + \mathbf{u} c_i \quad (\text{Eq. S25})$$

where  $z_i$  is the transport number ( $z_{Zn} = 2$ ),  $u_{m,i}$  is the electric mobility coefficient,  $F$  is the Faraday constant ( $96485 \text{ C mol}^{-1}$ ),  $\phi$  is the electrolyte potential. And the equilibrium potential of the

electrode surface obeys the Nernst equation as following formula:

$$E_{eq} = - \frac{\Delta G}{nF} \quad (\text{Eq.S26})$$

$$E_{eq} = E_{eq,ref} - \frac{RT}{nF} \ln \prod_i \left( \frac{\alpha_i}{\alpha_{i,ref}} \right)^{v_i} \quad (\text{Eq.S27})$$

where  $E_{eq}$  is the electrode potential,  $E_{eq,ref}$  is the standard electrode potential,  $\Delta G$  is the Gibbs free energy,  $R$  is the ideal gas constant,  $T$  is the Kelvin temperature,  $n$  is the transfer electron number of the reaction,  $\alpha_i$  is the electrode reactive ion concentration,  $\alpha_{i,ref}$  is the standard electrode reactive ion concentration,  $v_i$  is the reaction stoichimometric number.

The electrode reaction for the electrode surface abides by the Butler-Volmer kinetics expression, as displayed in following formula:

$$i_{loc} = i_0 \left( \exp \left( \frac{\alpha_a F \eta}{RT} \right) - \exp \left( \frac{-\alpha_c F \eta}{RT} \right) \right) \quad (\text{Eq. S28})$$

where  $i_{loc}$  is the local current density at the electrode/electrolyte interface,  $i_0$  is the exchange current density,  $\alpha_a$  and  $\alpha_c$  is the anodic and cathodic charge transfer coefficients,  $\eta$  is the activation overpotential.

### Section S3. Supplementary Characterizations

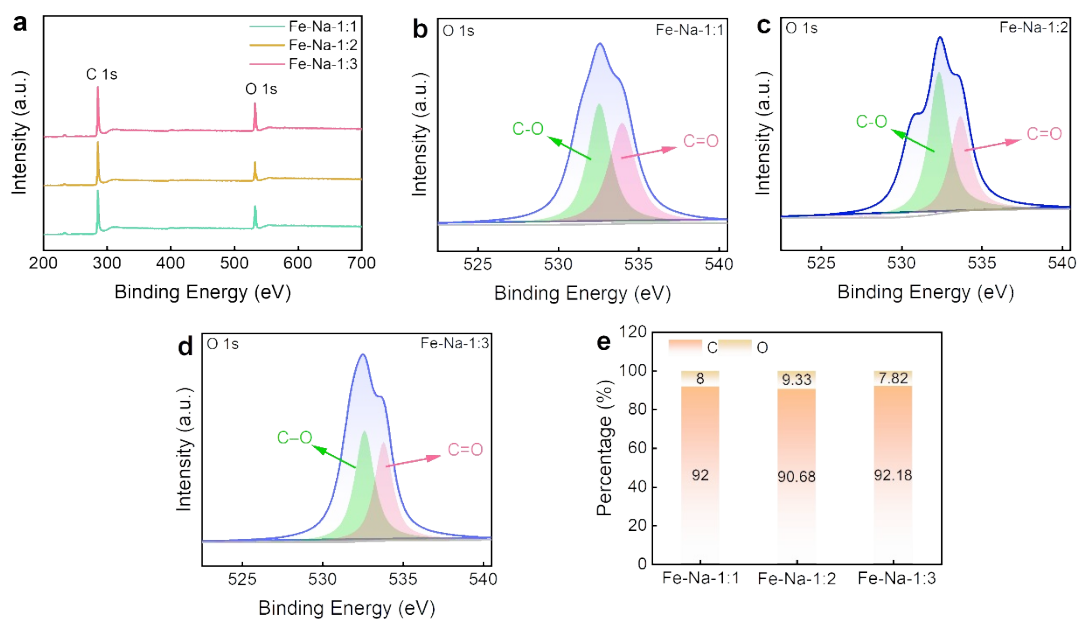

**Fig. S1** XPS survey spectra of resulted samples derived from the same amorphous carbon with different sodium metal treatment, (a) XPS survey profiles of Fe-Na and high-resolution O 1s XPS spectrum of (b) Fe-Na-1:1, (c) Fe-Na-1:2, (d) Fe-Na-1:3. (e) C, O percentage of various samples.

**Table S1.** Pore structure parameters of Fe-Na samples.

| Sample    | $S_{\text{BET}}$<br>( $\text{m}^2 \text{g}^{-1}$ ) | $S_{\text{micro}}$<br>( $\text{m}^2 \text{g}^{-1}$ ) | $S_{\text{meso}}$<br>( $\text{m}^2 \text{g}^{-1}$ ) | $V_{\text{total}}$<br>( $\text{cm}^3 \text{g}^{-1}$ ) | $V_{\text{meso}} / V_{\text{total}}$<br>(%) |
|-----------|----------------------------------------------------|------------------------------------------------------|-----------------------------------------------------|-------------------------------------------------------|---------------------------------------------|
| Fe-Na-1:1 | 1343                                               | 1070                                                 | 273                                                 | 1.20                                                  | 20.3                                        |
| Fe-Na-1:2 | 1720                                               | 1192                                                 | 528                                                 | 2.18                                                  | 30.7                                        |
| Fe-Na-1:3 | 1137                                               | 982                                                  | 155                                                 | 1.07                                                  | 13.6                                        |

$S_{\text{BET}}$ ,  $S_{\text{micro}}$ ,  $S_{\text{meso}}$ ,  $V_{\text{total}}$  and  $V_{\text{meso}}$  represents surface areas, micropore surface areas, mesopore surface areas, total pore volumes, mesopore volumes, respectively.

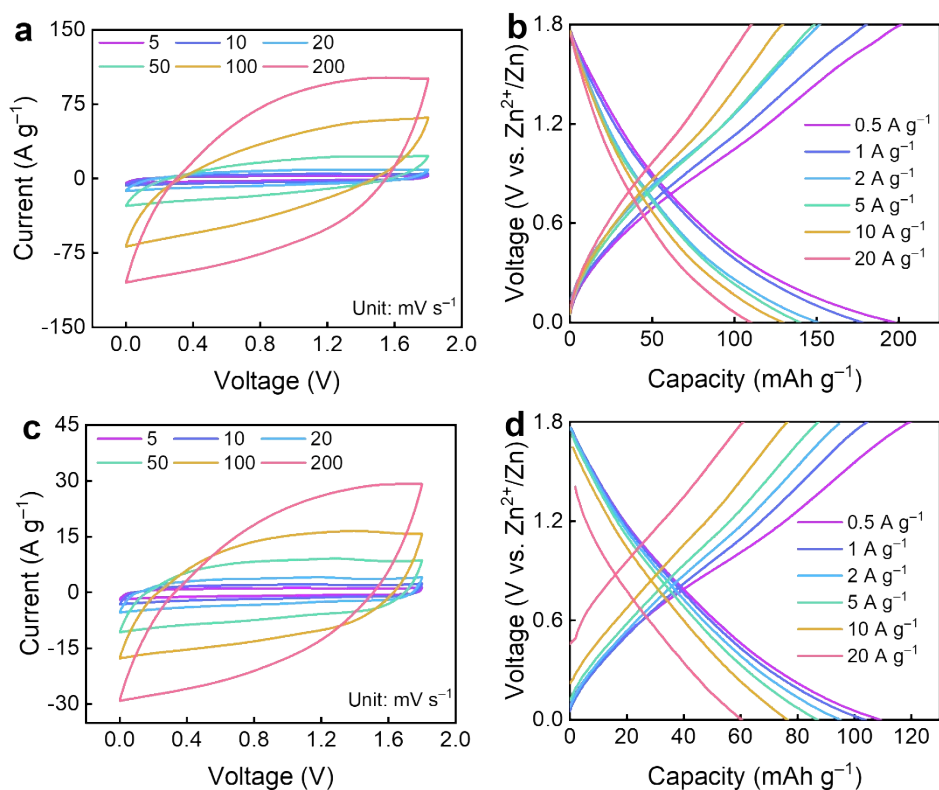

**Fig. S2** Electrochemical performances of Fe-Na electrodes: (a) CV curves of Fe-Na-1:1, (b) GCD file of Fe-Na-1:1, (c) CV curves of Fe-Na-1:3 and (d) GCD file of Fe-Na-1:3.

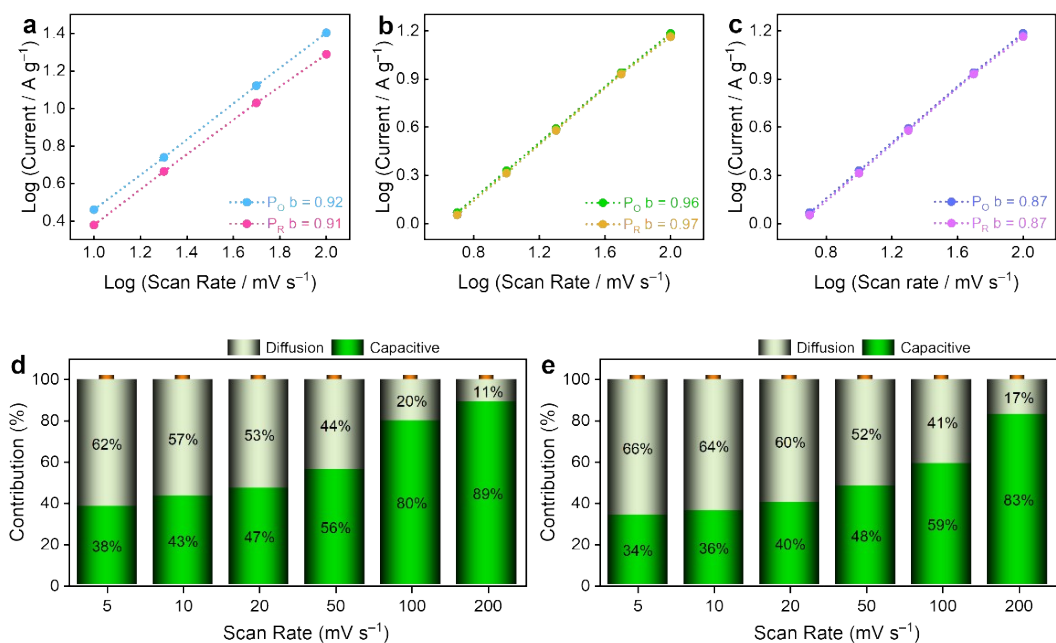

**Fig. S3** (a–c) b values in the anodic and cathodic of Fe-Na-1:1, Fe-Na-1:2 and Fe-Na-1:3. (d, e) Capacitive and diffusion-controlled ratios of Fe-Na-1:1 and Fe-Na-1:3.

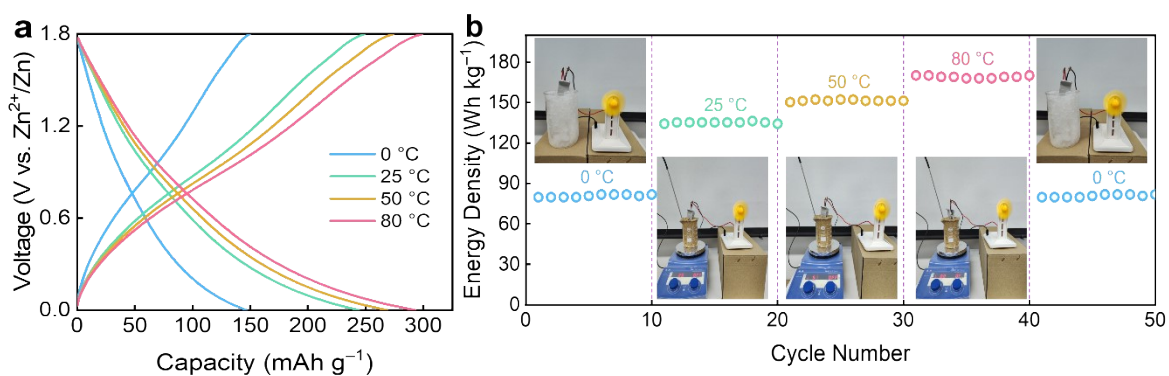

**Fig. S4** (a) Voltage-capacity profiles and (b) energy densities of the Fe-Na device under temperature conditions (inset shows the photograph of a fan powered by the device).

**Table S2.** Comparison of electrochemical kinetics parameters of Fe-Na-based ZHCs

| Device    | $E_g$ (eV) | $E_{a1}$ (kJ mol <sup>-1</sup> ) | $E_{a2}$ (kJ mol <sup>-1</sup> ) | $R_s$ ( $\Omega$ ) | $R_{ct}$ ( $\Omega$ ) | $\tau$ (s) | $\sigma$ ( $\Omega$ s <sup>-0.5</sup> ) | $D_{Zn^{2+}}$ (cm <sup>2</sup> s <sup>-1</sup> ) |
|-----------|------------|----------------------------------|----------------------------------|--------------------|-----------------------|------------|-----------------------------------------|--------------------------------------------------|
| Fe-Na-1:1 | 2.91       | 3.2                              | 13.1                             | 1.14               | 17.1                  | 6.8        | 16.9                                    | $2.71 \times 10^{-7}$                            |
| Fe-Na-1:2 | 2.74       | 1.8                              | 9.4                              | 0.7                | 9.4                   | 4.6        | 6.5                                     | $1.72 \times 10^{-6}$                            |
| Fe-Na-1:3 | 3.32       | 5.3                              | 17.4                             | 1.7                | 25                    | 7.1        | 21.8                                    | $1.42 \times 10^{-7}$                            |

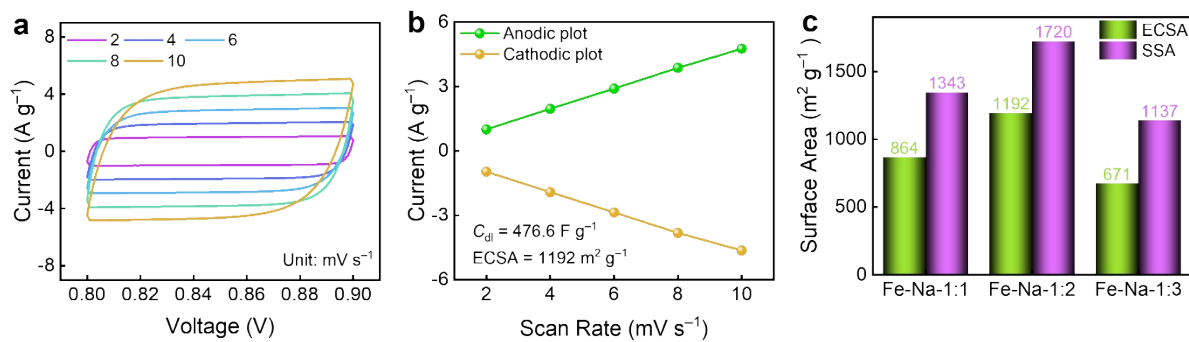

**Fig. S5** (a) CV curves of Fe-Na-1:2 based ZHCs at different scan rates. (b) Cathodic/anodic charging current densities of Fe-Na-1:2 based ZHCs measured at 0.85 V plotted as a function of scan rate. (c) ECSA and SSA within various Fe-Na electrodes.

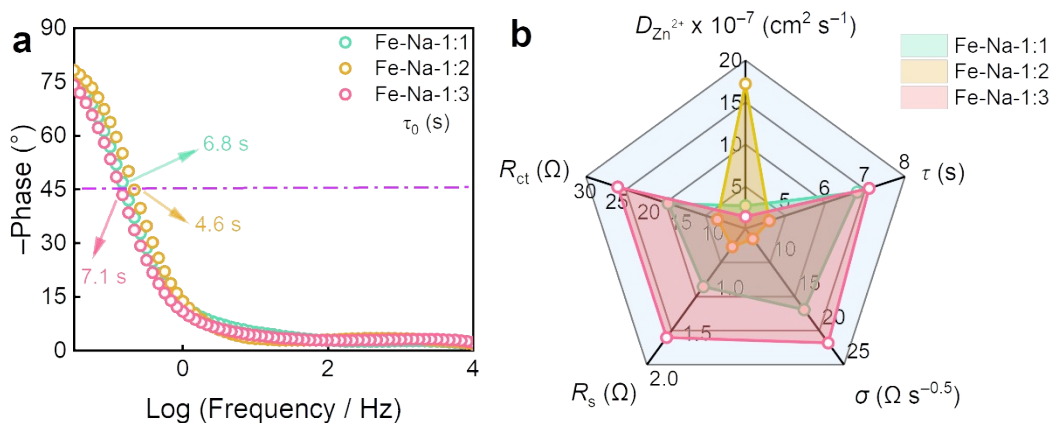

**Fig. S6** (a) Bode plots. (b) Five contrasts of all devices.

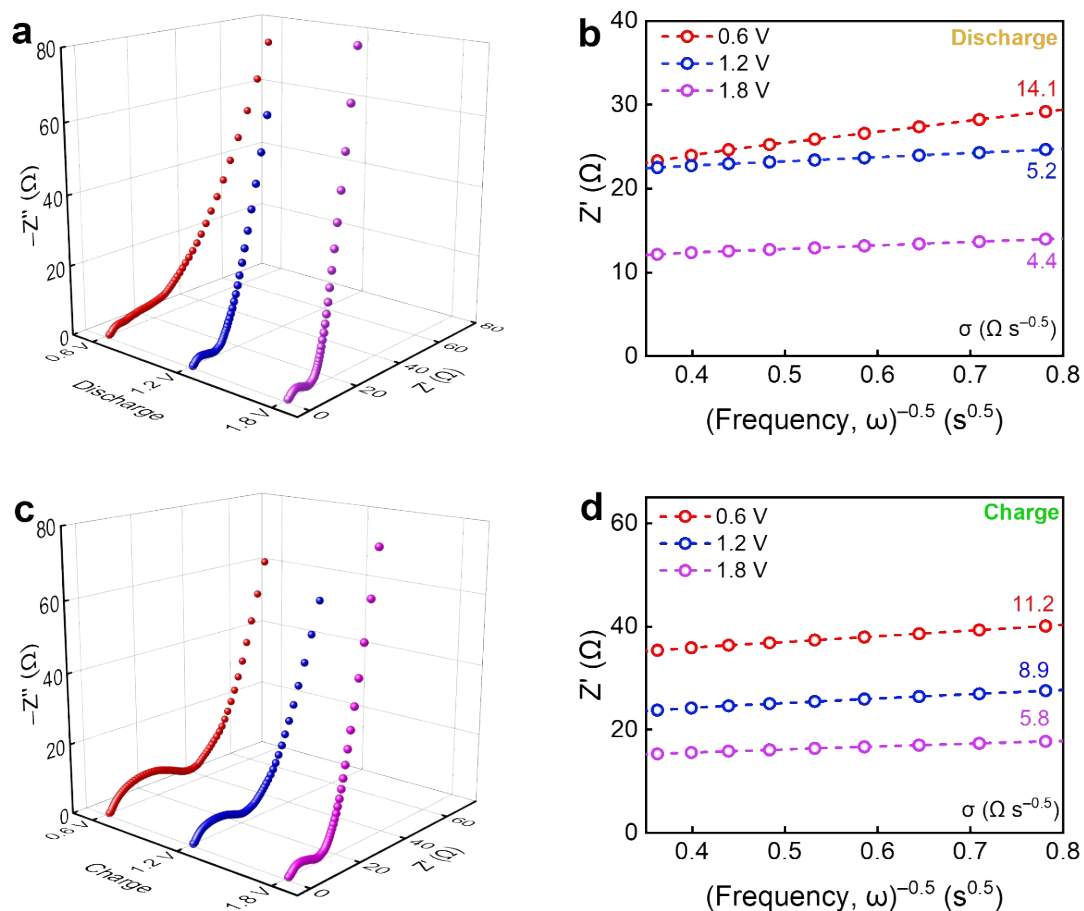

**Fig. S7** (a, c) Spatial distribution of EIS curves of Fe-Na-1:2-loaded ZHCs at various discharge/charge process. (b, d) Randles plots of Fe-Na electrodes in dynamic charge/discharge process.

**Table S3.** Comparison of specific capacity ( $C_m$ ), energy density ( $E$ ), and capacity retention after cycling of recently reported carbon-based ZHCs in the literatures.

| Materials               | $C_m$<br>(mAh g <sup>-1</sup> )                         | $E$<br>(Wh kg <sup>-1</sup> ) | Cycling Lifespan<br>(%)                                                  | Refs.     |
|-------------------------|---------------------------------------------------------|-------------------------------|--------------------------------------------------------------------------|-----------|
| MLG in amorphous carbon | 278@0.2 A g <sup>-1</sup><br>115@100 A g <sup>-1</sup>  | 148.9                         | 92.9%, 300,000 cycles, 10 A g <sup>-1</sup><br>99.1%, Coulomb efficiency | This work |
| MOF-derived carbon      | 49.8@0.05 A g <sup>-1</sup><br>24.9@5 A g <sup>-1</sup> | 58.1                          | 100%, 9,000 cycles, 1 A g <sup>-1</sup>                                  | [S7]      |

|                      |                             |       |                                             |       |
|----------------------|-----------------------------|-------|---------------------------------------------|-------|
| Carbon cages         | 225@0.1 A g <sup>-1</sup>   | 97    | 96.5%, 300,000 cycles, 50 A g <sup>-1</sup> | [S8]  |
|                      | 71@20 A g <sup>-1</sup>     |       |                                             |       |
| Carbon nanofibers    | 136@0.1 A g <sup>-1</sup>   | 98.3  | 99.2%, 200,000 cycles, 40 A g <sup>-1</sup> | [S9]  |
|                      | 57@50 A g <sup>-1</sup>     |       |                                             |       |
| Porous carbon        | 179.8@0.1 A g <sup>-1</sup> | 104.8 | 99.2%, 30,000 cycles, 20 A g <sup>-1</sup>  | [S10] |
|                      | 78.4@20 A g <sup>-1</sup>   |       |                                             |       |
| N-doped carbon       | 98@0.1 A g <sup>-1</sup>    | 82    | 100%, 30,000 cycles, 5 A g <sup>-1</sup>    | [S11] |
|                      | 61@20 A g <sup>-1</sup>     |       |                                             |       |
| Pitch-derived carbon | 136.2@0.3 A g <sup>-1</sup> | 81.1  | 98.9%, 60,000 cycles, 10 A g <sup>-1</sup>  | [S12] |
|                      | 69.2@15 A g <sup>-1</sup>   |       |                                             |       |
| Layered carbon       | 127.7@0.5 A g <sup>-1</sup> | 86.8  | 81.3%, 6500 cycles, 5 A g <sup>-1</sup>     | [S13] |
|                      | 42.8@20 A g <sup>-1</sup>   |       |                                             |       |
| Activated graphene   | 112@0.1 A g <sup>-1</sup>   | 106.3 | 93%, 80,000 cycles, 8 A g <sup>-1</sup>     | [S14] |
|                      | 55@20 A g <sup>-1</sup>     |       |                                             |       |

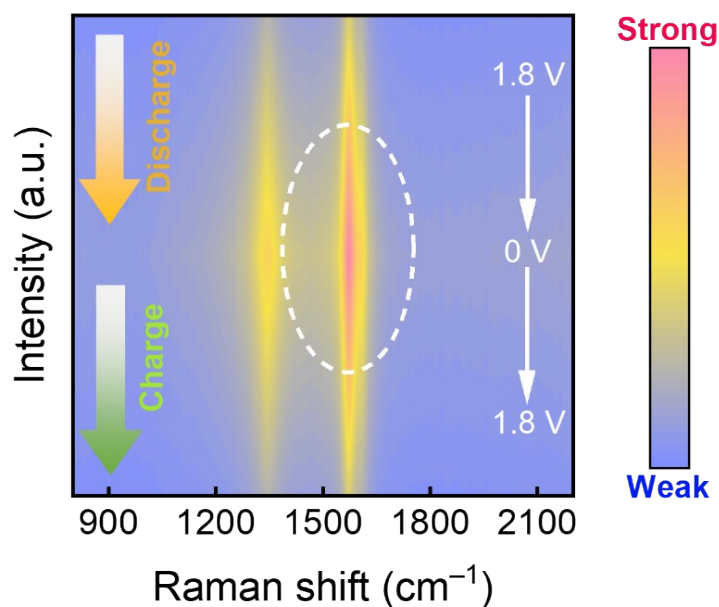

**Fig. S8** *Ex-situ* Raman spectra of Fe-Na-1:2-based ZHC.



**Table S4.**  $R_s$ ,  $R_{ct}$ ,  $\sigma$  and  $D_{Zn^{2+}}$  of Fe-Na-1:2 devices in dynamic charge/discharge process.

| Sample          | $R_s$ ( $\Omega$ ) | $R_{ct}$ ( $\Omega$ ) | $\sigma$ ( $\Omega s^{-0.5}$ ) | $D_{Zn^{2+}}$ ( $cm^2 s^{-1}$ ) |
|-----------------|--------------------|-----------------------|--------------------------------|---------------------------------|
| Discharge-1.8 V | 1.5                | 4.3                   | 4.4                            | $6.1 \times 10^{-9}$            |
| Discharge-1.2 V | 1.4                | 10.3                  | 5.2                            | $4.5 \times 10^{-9}$            |
| Discharge-0.6 V | 1.6                | 18.1                  | 14.1                           | $6.6 \times 10^{-10}$           |
| Charge-0.6 V    | 1.3                | 26.6                  | 11.2                           | $1.4 \times 10^{-9}$            |
| Charge-1.2 V    | 1.2                | 17.7                  | 8.9                            | $2.4 \times 10^{-9}$            |
| Charge-1.8 V    | 1.4                | 11.8                  | 5.8                            | $1.7 \times 10^{-8}$            |

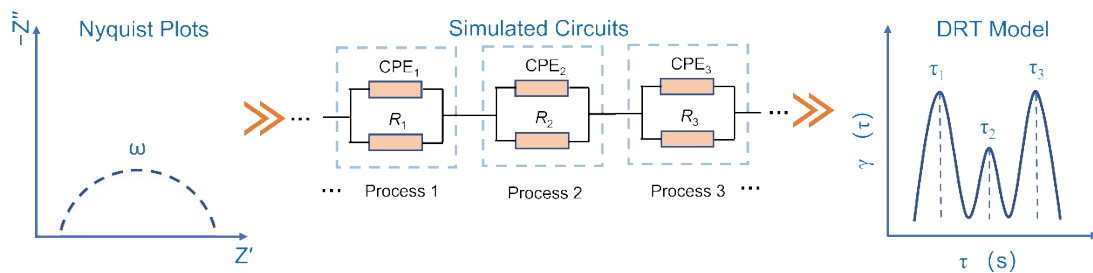

**Fig. S9** Schematic of the typical impedance results shown in Nyquist plots, simulated circuit, and the DRT models. A Nyquist plot consists of a series of the paralleled RC Randles circuits, which are associated with specific DRT peaks of a specific paralleled RC circuit.

**Table S5.** Summary of DRT peak regions for ZHCs

| DRT Peak Region | Approximate time constant $\tau$ | Assignment                     |
|-----------------|----------------------------------|--------------------------------|
| $\tau_1$        | 1.2 $\mu s$                      | Inter-particle resistance      |
| $\tau_2$        | $4.6 \times 10^{-6} \sim 0.02$ s | Interfacial resistance         |
| $\tau_3$        | 0.02 $\sim$ 0.2 s                | Interfacial resistance (charge |

transfer)

$\tau_4$

0.2 ~ 10 s

Diffusion resistance

---

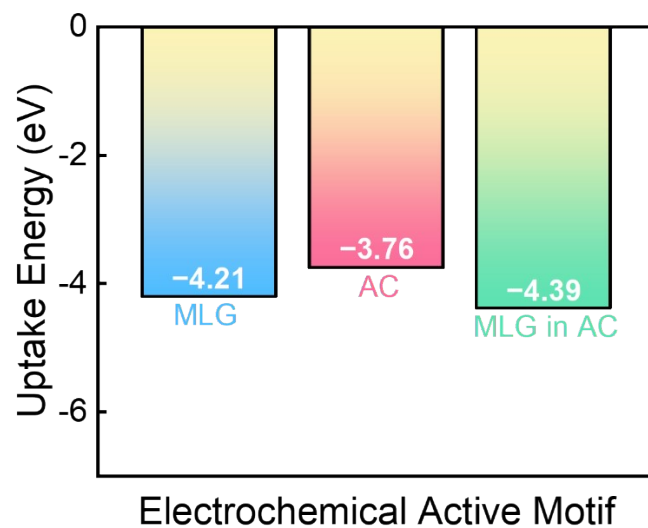

**Fig. S10** The uptake energy values of single  $\text{SO}_3\text{CF}_3^-$  adsorbed on the optimized redox-active sole carbonylic MLG and amorphous carbon, and synergetic MLG in amorphous carbon sites.

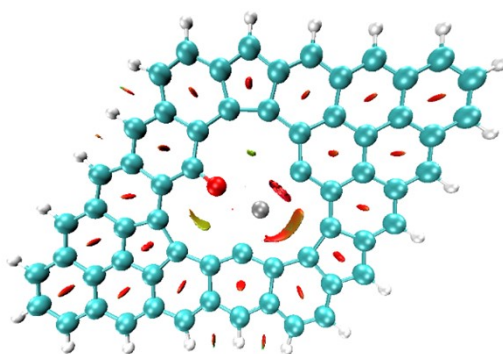

**Fig. S11** Top view of the weak interaction.

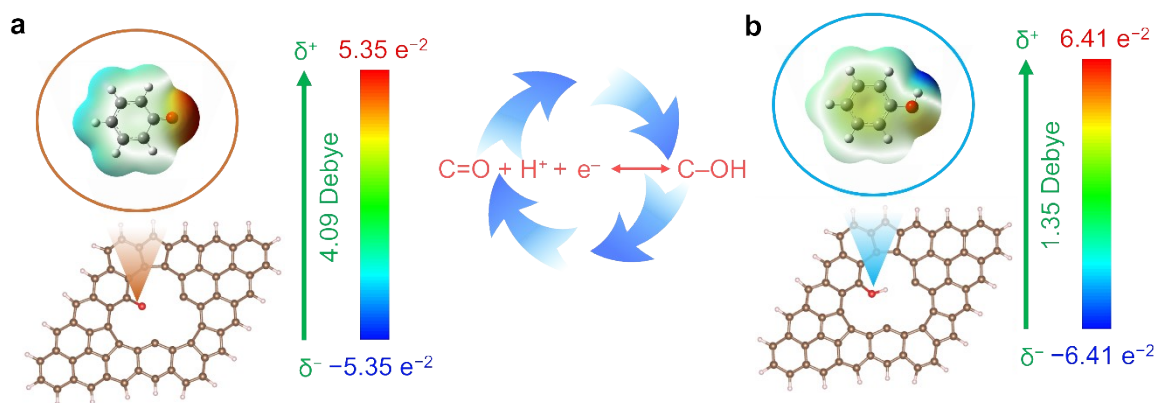

**Fig. S12** Carbonylic decorated carbon frame structure transformation with H ion.

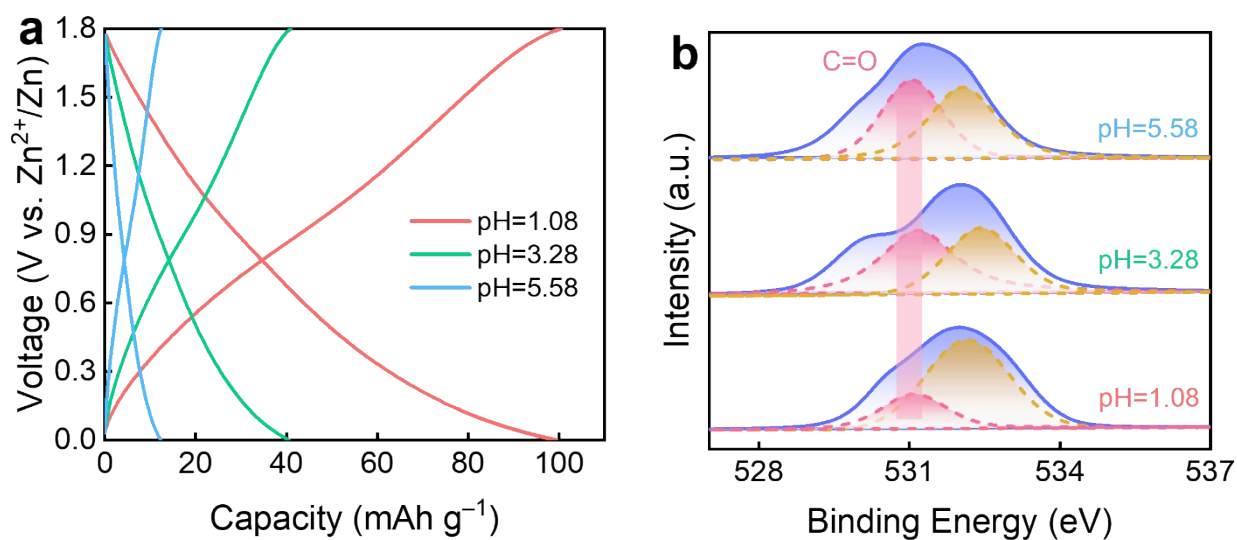

**Fig. S13** (a) GCD curves at  $0.5 \text{ A g}^{-1}$  of Fe-Na cathode in  $\text{HCF}_3\text{SO}_3$  electrolytes with different pH values and (b) corresponding high-resolution O 1s XPS spectra of Fe-Na cathodes at the fully discharged state.

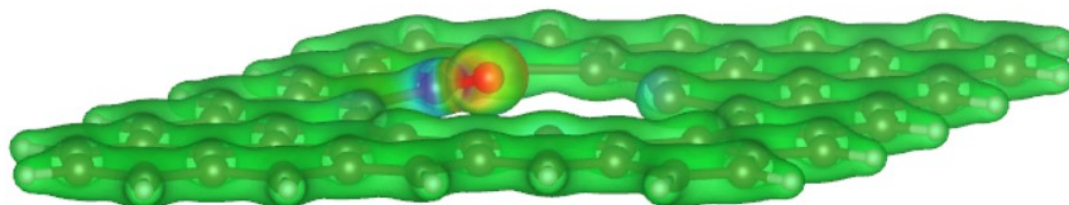

**Fig. S14** Side view of the charge density of carbonylic decorated carbon frame work.

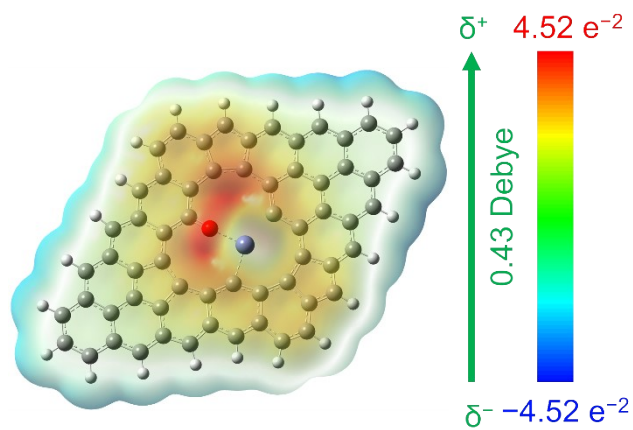

**Fig. S15** Electrostatic potential of carbonylic decorated carbon frame work with adsorbed Zn.

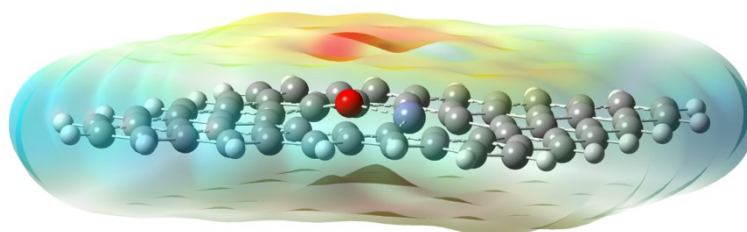

**Fig. S16** Sideview of electrostatic potential of carbonylic decorated carbon frame work with adsorbed Zn.

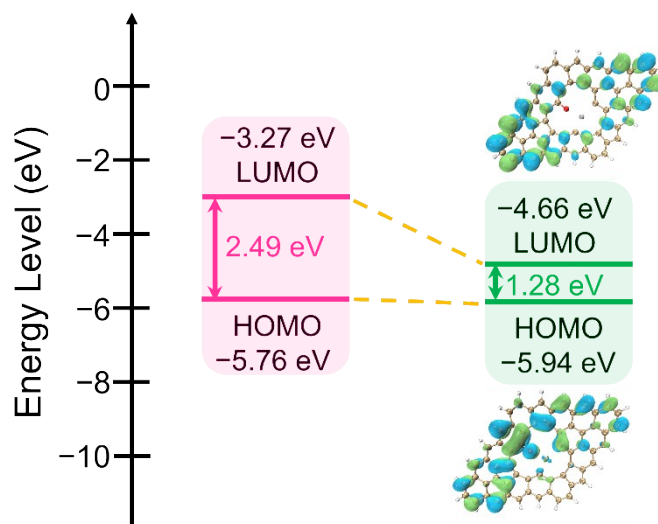

**Fig. S17** Energy level of zincophilic carbon frame work before optimized and after optimized.

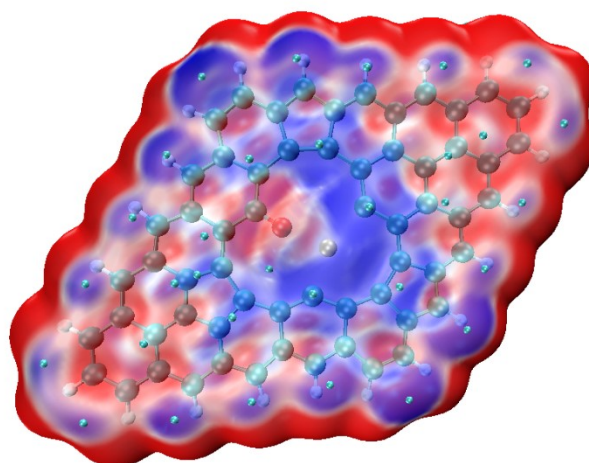

**Fig. S18** Average local ionization energies of carbon frame work with adsorbed Zn.(Cyan dots at isosurface represent extreme sites).

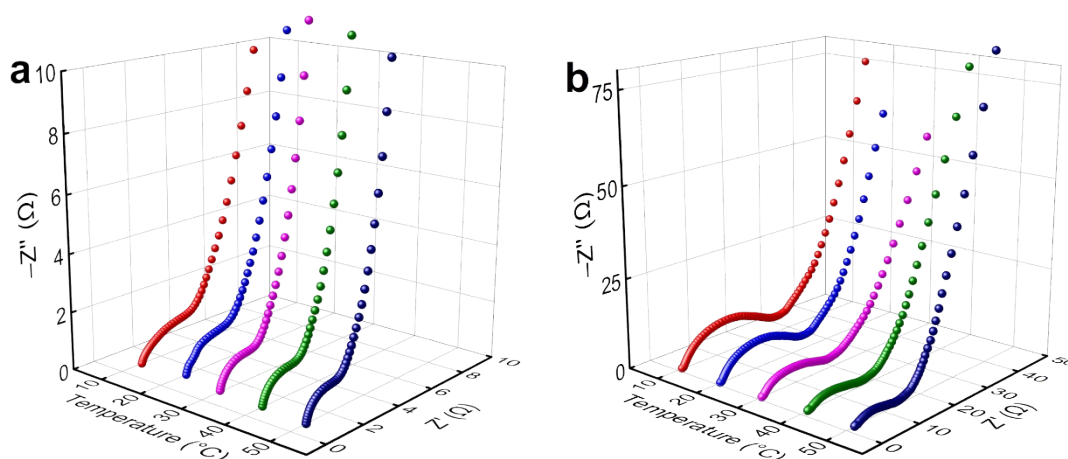

**Fig. S19** EIS spectra of Fe-Na-1:2-based ZHCs at various temperatures at (a) 0.2 V and (b) 1 V.

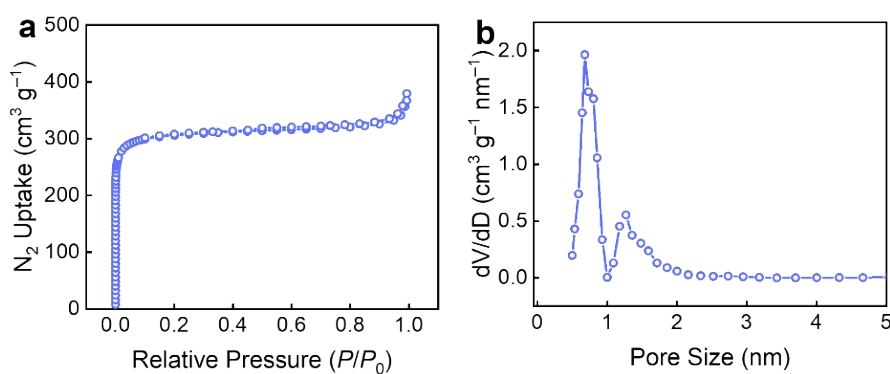

**Fig. S20** (a) Nitrogen sorption isotherm and (b) corresponding pore size distribution curve of Fe-0.01 sample.

**Table S6.** Element contents of samples.

| Samples   | C<br>(at.%) | O<br>(at.%) | Fe<br>(at.%) |
|-----------|-------------|-------------|--------------|
| Fe-Na-1:1 | 91.99       | 7.99        | 0.02         |
| Fe-Na-1:2 | 90.65       | 9.33        | 0.01         |
| Fe-Na-1:3 | 92.18       | 7.80        | 0.02         |

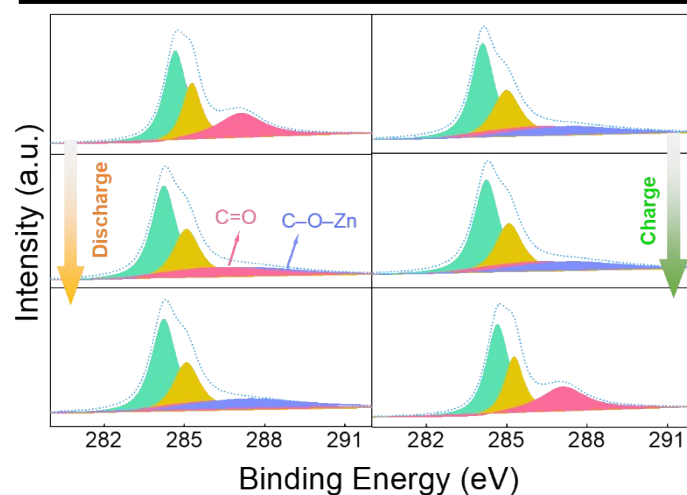

**Fig. S21** High-resolution C 1s XPS spectra of Fe-Na-1:2 cathode at the fully discharged state.

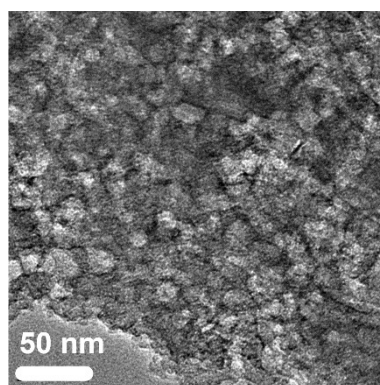

**Fig. S22** Ni/Na synergism formation of carbon samples.

## Reference

- [S1] F. Ciuccia, C. Chen, Analysis of Electrochemical Impedance Spectroscopy Data Using the Distribution of Relaxation Times A Bayesian and Hierarchical Bayesian Approach, *Electrochim. Acta* 167 (2015) 439–454.

- [S2] M.B. Effat, F. Ciucci, Bayesian and Hierarchical Bayesian Based Regularization for Deconvolving the Distribution of Relaxation Times from Electrochemical Impedance Spectroscopy Data, *Electrochim. Acta* 247 (2017) 1117–1129.
- [S3] J. Liu, T.H. Wan, F. Ciucci, A Bayesian View on the Hilbert Transform and the KramersKronig Transform of Electrochemical Impedance Data: Probabilistic Estimates and Quality Scores, *Electrochim. Acta* 357 (2020) 136864.
- [S4] T.H. Wan, M. Saccoccio, C. Chen, F. Ciucci, Influence of the Discretization Methods on the Distribution of Relaxation Times Deconvolution Implementing Radial Basis Functions with DRTtools, *Electrochim. Acta* 184 (2015) 483–499.
- [S5] T. Lu, F. Chen, Multiwfn: A multifunctional wavefunction analyzer, *J. Comput. Chem.* 33 (2012) 580–592.
- [S6] D. Wang, D. Lv, H. Liu, S. Zhang, C. Wang, C. Wang, J. Yang, Y. Qian, In-situ Formation of Nitrogen-Rich Solid Electrolyte Interphase and Simultaneous, *Angew. Chem., Int. Ed.* (2022) 202212839.
- [S7] X. Qiu, N. Wang, Z. Wang, F. Wang, Y. Wang, Towards High-Performance Zinc-Based Hybrid Supercapacitors via Macropores-Based Charge Storage in Organic Electrolytes, *Angew.Chem. Int. Ed.* 60 (2021) 9610–9617.
- [S8] C.-C. Hou, Y. Wang, L. Zou, M. Wang, H. Liu, Z. Liu, H.-F. Wang, C. Li, Q. Xu, A Gas-Steamed MOF Route to P-Doped Open Carbon Cages with Enhanced Zn-Ion Energy Storage Capability and Ultrastability, *Adv. Mater.* 33 (2021) 2101698.
- [S9] H. He, J. Lian, C. Chen, Q. Xiong, C.C. Li, M. Zhang, Enabling Multi-Chemisorption Sites on Carbon Nanofibers Cathodes by an In-situ Exfoliation Strategy for High-Performance Zn–Ion Hybrid Capacitors, *Nano-Micro Lett.* 14 (2022) 106.

- [S10] J. Yin, W. Zhang, W. Wang, N.A. Alhebshi, N. Salah, H.N. Alshareef, Electrochemical Zinc Ion Capacitors Enhanced by Redox Reactions of Porous Carbon Cathodes, *Adv. Energy Mater.* 10 (2020) 2001705.
- [S11] N. Chang, T. Li, R. Li, S. Wang, Y. Yin, H. Zhang, X. Li, An aqueous hybrid electrolyte for low-temperature zinc-based energy storage devices, *Energy Environ. Sci.* 13 (2020) 3527--3535.
- [S12] X. Shi, H. Zhang, S. Zeng, J. Wang, X. Cao, X. Liu, X. Lu, Pyrrolic-Dominated Nitrogen Redox Enhances Reaction Kinetics of Pitch-Derived Carbon Materials in Aqueous Zinc Ion Hybrid Supercapacitors, *ACS Mater. Lett.* 3(9) (2021) 1291–1299.
- [S13] Y. Lu, Z. Li, Z. Bai, H. Mi, C. Ji, H. Pang, C. Yu, J. Qiu, High energy-power Zn-ion hybrid supercapacitors enabled by layered B/N co-doped carbon cathode, *Nano Energy* 66 (2019) 104132.
- [S14] S. Wu, Y. Chen, T. Jiao, J. Zhou, J. Cheng, B. Liu, S. Yang, K. Zhang, W. Zhang, An Aqueous Zn-Ion Hybrid Supercapacitor with High Energy Density and Ultrastability up to 80 000 Cycles, *Adv. Energy Mater.* 9 (2019) 1902915.
